# Supplementary material for: Topographic Distribution of Stimulus-Specific Adaptation across Auditory Cortical Fields in the Anesthetized Rat
Source: PLoS Biol. 2016 Mar 7;14(3):e1002397. doi: 10.1371/journal.pbio.1002397 (PMC4780834; doi:10.1371/journal.pbio.1002397)
Supplement: S8 Data — (XLSX) [file pbio.1002397.s008.xlsx]

## Sheet: LFP-CSI
			Nd					Pd					MUA
ANIMAL	TRACK	FIELD	dev1 peak	dev2 peak	std1 peak	std2 peak	CSI	dev(f1) peak	dev(f2) peak	std(f1) peak	std(f2) peak	CSI	CSI-onset	CSI-sustained	CSI-offset
'14-085'	1.1	'VAF'	88.832	33.3225	44.092	44.1675	0.161087	44.603	19.784	19.351	35.528	0.079721	-0.178911	0.0811643	0.172325
'14-085'	10.1	'A1'	187.594	157.509	41.851	62.435	0.535876	66.6165	94.931	28.994	34.5895	0.435142	0.809773	0.740486	0.832702
'14-085'	11.1	'A1'	165.044	208.143	45.216	73.985	0.515825	71.0275	98.573	16.526	36.372	0.524509	0.667201	0.776586	0.879072
'14-085'	12.1	'VAF'	95.5578	151.776	30.783	20.792	0.654911	66.1323	85.8	23.8675	18.006	0.567882	0.767159	0.639951	0.86448
'14-085'	13.1	'VAF'	69.8255	66.0765	11.261	21.2665	0.613755	51.0605	36.879	14.446	17.4225	0.468007		0.55433	1
'14-085'	14.1	'VAF'	100.957	166.214	21.8175	30.492	0.672534	64.3255	88.371	29.1585	15.522	0.547257	0.987427	0.859583	0.78913
'14-085'	15.1	'VAF'	131.699	124.043	37.337	26.1055	0.602471	83.7333	63.4935	35.5275	29.798	0.385323	0.899698	0.666932	0.611305
'14-085'	16.1	'VAF'	-17.9175	5.29583	-22.5667	-9.026	0.429069	43.7145	37.512	51.3745	56.56	-0.141192	0.608888	0.509339	0.139826
'14-085'	17.1	'SRAF'	180.178	182.662	58.378	49.948	0.540179	82.3599	83.3235	28.602	33.032	0.457727	0.635649	0.47508	0.468734
'14-085'	18.1	'SRAF'	-0.446	228.122	24.044	1.591	0.797601	27.4615	66.7965	23.169	28.1985	0.294526	0.35984	0.406685	0.584205
'14-085'	19.1	'SRAF'	59.205	3.8335	2.7235	18.6975	0.492751	25.0075	14.9995	19.385	20.0115	0.00768858	0.163455	0.442972	0.526096
'14-085'	20.1	'SRAF'	34.041	114.916	20.3845	36.4275	0.447808	17.8565	55.6585	18.491	24.8405	0.258318		0.407799	0.44946
'14-085'	22.1	'SRAF'	33.1875	161.052	30.0375	48.2495	0.425472	16.5815	59.0435	19.3995	20.8705	0.305061		0.400551	0.345048
'14-085'	23.1	'SRAF'	120.754	33.472	42.4125	7.8925	0.508095	52.0725	27.702	18.004	4.5995	0.558431	-0.837411	0.253485	0.337124
'14-085'	24.1	'SRAF'	33.7284	114.819	14.302	15.1538	0.669041	18.8784	30.1995	8.274	14.6033	0.364124	0.97747	0.957889	0.824616
'14-085'	25.1	'SRAF'	106.859	174.107	19.6265	30.598	0.696703	49.505	76.6224	12.9395	11.681	0.673355	0.812639	0.851061	0.991517
'14-085'	26.1	'SRAF'	110.314	124.843	17.8345	8.6235	0.797733	65.96	62.7536	5.83	14.6005	0.72603	0.976958	1	1
'14-085'	27.1	'VAF'	202.906	182.159	49.529	61.245	0.553185	105.894	93.837	39.9475	36.1225	0.44837	0.576704	0.689327	0.880039
'14-085'	28.1	'VAF'	65.3775	9.64635	-1.8276	6.373	0.88575	40.041	19.6333	41.801	22.3405	-0.0360794	0.825081	0.501144	0.453911
'14-085'	29.1	'VAF'	18.3995	19.876	2.1785	26.7265	0.139482	16.592	39.6525	23.284	42.464	-0.0779023	0.48016	0.44837	0.455795
'14-085'	3.1	'A1'	129.982	121.233	36.323	29.9875	0.58233	71.843	74.065	35.862	18.1025	0.460011	0.849759	0.503128	0.359298
'14-085'	30.1	'VAF'	36.7695	72.489	65.576	36.4175	0.0343902	38.286	76.3605	32.306	82.888	-0.00238209	0.115504	-0.0366759	0.114778
'14-085'	32.1	'A1'	196.095	233.172	154.887	217.546	0.0708926	50.2585	82.955	58.0075	87.587	-0.0444069	0.0250145	0.217983	0.189279
'14-085'	33.1	'A1'	336.879	186.817	227.542	156.326	0.15407	121.871	60.835	83.697	68.314	0.0917057	0.181692	0.166608	0.2682
'14-085'	34.1	'A1'	175.559	150.448	59.5605	76.9445	0.409723	79.447	103.014	30.359	39.6295	0.445524	0.425577	0.595331	0.485218
'14-085'	35.1	'PAF'	156.553	53.0215	34.7175	33.116	0.510948	95.103	50.8305	28.0025	20.9355	0.497741	0.693459	0.676775	0.562908
'14-085'	36.1	'PAF'	55.8045	21.0854	18.3945	7.7835	0.492024	37.2085	28.4729	15.2205	13.5695	0.390503	0.65054	0.597896	-0.624784
'14-085'	37.1	'PAF'	84.3219	22.4325	26.146	5.975	0.537413	61.5021	22.1805	23.0665	7.8075	0.460983	0.472731
'14-085'	38.1	'A1'	9.908	-2.1026	2.2401	0.52	0.477525	44.147	32.0755	52.575	32.2655	-0.0535069	0.105914	0.427875	0.489093
'14-085'	39.1	'A1'	62.609	122.647	99.978	16.014	0.229925	17.727	74.951	58.8595	21.617	0.070466	0.385254	0.410025	0.672696
'14-085'	4.1	'A1'	245.298	210.381	113.385	126.718	0.309834	97.39	93.9595	82.0305	86.927	0.062147	0.319611	-0.449718
'14-085'	40.1	'PAF'	81.575	41.393	11.1275	33.744	0.465305	42.345	31.0975	7.8775	5.9515	0.683081	0.716854	0.865311	0.595338
'14-085'	41.1	'PAF'	49.983	45.026	5.7665	8.585	0.737538	21.2915	23.607	6.696	7.619	0.516495		0.843689	0.945517
'14-085'	43.1	'PAF'	77.182	30.7914	24.8203	13.882	0.472274	61.5705	25.6398	15.8758	18.0975	0.439309	0.337437	0.141587
'14-085'	44.1	'PAF'	121.41	55.968	73.549	43.8375	0.203523	64.14	30.4855	48.221	35.2355	0.0627183	0.264499	-0.118322
'14-085'	45.2	'PAF'	80.258	38.777	44.0175	13.092	0.351561	67.483	32.109	27.3125	10.237	0.452398	0.319618	0.0286282	-0.671639
'14-085'	46.1	'PAF'	274.163	145.339	126.847	111.372	0.275624	125.349	79.0985	80.9525	62.5755	0.175069	0.395165	0.703189	0.744987
'14-085'	47.1	'PAF'	133.385	76.1125	24.961	2.855	0.765576	69.1345	41.8165	25.037	16.5205	0.455014	0.627588	0.698093	0.832456
'14-085'	49.1	'A1'	224.858	97.824	78.1345	17.1085	0.54421	125.16	54.451	58.505	25.9415	0.360394	0.515009	0.643515	1
'14-085'	5.1	'A1'	168.523	251.94	67.074	52.442	0.557331	89.6755	112.961	29.3885	47.797	0.448324	0.750585	0.704235	0.609421
'14-085'	50.1	'A1'	224.791	218.495	130.095	147.149	0.230446	127.729	142.331	78.163	96.1095	0.215577	0.259833	0.332872	0.617625
'14-085'	51.1	'A1'	4.91354	48.1765	63.861	6.06771	-0.136879	9.64583	47.3405	37.7665	11.7786	0.0698497	0.582537	0.39042	0.0958912
'14-085'	53.1	'A1'	168.878	98.572	105.132	71.5895	0.204263	94.3905	51.363	60.8855	42.588	0.169645	0.476416	0.900341	0.932372
'14-085'	54.1	'A1'	64.9695	147.654	52.012	66.873	0.282763	20.591	84.3785	27.679	43.37	0.19271	0.21	0.212427	0.156182
'14-085'	55.1		230.56	197.125	100.508	103.175	0.354787	134.884	76.864	41.4295	48.007	0.406102	0.360667	0.456617	0.190811
'14-085'	56.1	'A1'	151.993	144.262	73.9525	34.3975	0.464416	121.195	111.608	46.0585	20.801	0.553766	0.552117	0.767423
'14-085'	57.1	'A1'	226.997	122.39	168.868	99.4545	0.131234	122.464	89.5215	113.362	70.893	0.0699843	0.243269	0.127892	0.905045
'14-085'	58.1		74.061	174.762	65.292	92.862	0.222788	48.1215	97.7305	45.715	79.2655	0.0770642	0.228856	0.20042	-0.351197
'14-085'	59.1		120.421	179.436	23.5255	75.609	0.503074	98.3182	69.215	23.9765	43.8015	0.423929	0.685178	0.856017	1
'14-085'	6.1	'A1'	23.0719	61.599	4.369	8.19063	0.741653	14.4536	29.0225	19.8025	6.01198	0.254893			0.852317
'14-085'	60.1	'A1'	202.814	257.058	97.699	94.6525	0.410167	144.321	128.305	62.0155	58.862	0.385634	0.471406	0.48637
'14-085'	61.1	'A1'	163.942	294.146	74.203	144.701	0.353304	116.548	128.165	51.1125	72.4625	0.328923	0.255699	0.472448
'14-085'	63.1	'A1'	93.664	100.721	26.6775	27.73	0.562627	65.3205	63.8695	20.59	18.59	0.534596	0.645831	0.57238	0.884399
'14-085'	64.1	'A1'	153.792	7.4855	6.392	70.2945	0.355477	100.727	8.598	6.5	54.62	0.282816	0.499032	0.186554	0.855011
'14-085'	68.1	'A1'	132.985	127.749	88.9025	91.5015	0.182098	62.548	77.2475	59.6415	53.262	0.106419	0.148693	-0.0200051	0.35506
'14-085'	69.1	'A1'	168.211	82.4835	76.78	64.0245	0.28069	102.834	48.528	51.202	41.9195	0.238217	0.340101	0.098672	-0.461482
'14-085'	7.1	'A1'	100.9	8.82656	3.3724	36.5335	0.466616	57.543	13.9031	3.28021	27.209	0.401793	0.860276	0.537459	0.332343
'14-085'	70.1	'A1'	139.126	140.424	75.4995	97.264	0.23609	84.877	82.053	45.825	56.7525	0.238778	0.360188	0.162914	0.562291
'14-085'	71.1	'PAF'	48.426	141.457	20.6115	56.0435	0.424809	26.7193	70.7265	13.168	20.296	0.488747	0.999055	0.867361	0.609287
'14-085'	72.1	'PAF'	58.5345	20.9661	15.1295	8.3565	0.543902	19.8835	3.58393	8.77054	4.6225	0.273312		0.692259	0.770717
'14-085'	74.1	'PAF'	98.2536	75.745	62.353	48.937	0.219808	48.6646	43.488	38.913	32.3005	0.128173	-0.0872792	0.398837	0.539715
'14-085'	75.1	'A1'	103.478	107.452	105.377	72.4792	0.085067	53.1988	61.4927	65.086	50.0339	-0.00186418	0.193984	0.209849	0.754175
'14-085'	76.1	'A1'	127.569	120.298	98.9045	101.088	0.106896	79.0672	70.415	76.7375	63.8705	0.0305911	0.222136	0.319762	0.667031
'14-085'	77.1	'VAF'	30.1625	22.451	10.1815	45.4875	-0.0282179	19.89	10.998	5.1595	26.675	-0.0150903	0.530953	0.567287	0.718452
'14-085'	78.1	'VAF'	108.394	80.2525	29.204	77.2925	0.278341	59.404	47.182	19.864	45.8875	0.236945	0.502787	0.425567	0.809875
'14-085'	79.1	'VAF'	96.931	114.489	54.118	69.666	0.261441	55.073	69.376	36.217	44.258	0.214587	0.656687	0.498212
'14-085'	8.1	'A1'	108.579	-11.0705	-9.637	68.021	0.250969	63.574	33.137	53.905	50.046	-0.0360806	0.641587	0.822577	0.776754
'14-085'	80.1	'VAF'	57.068	138.12	66.4225	85.299	0.125296	46.8085	82.3083	38.281	57.6095	0.147668	0.166814	0.0170274	0.239756
'14-085'	81.1	'VAF'	101.738	62.1484	62.187	55.9605	0.162175	67.6891	35.7604	48.1225	43.5375	0.0604249	0.371386	0.440482	0.229543
'14-085'	84.1	'VAF'	111.986	16.8042	18.4563	50.8245	0.300443	63.5175	7.29948	9.71562	27.8465	0.306838	0.198274	0.0857887	0.366565
'14-085'	85.1	'VAF'	12.285	50.6885	31.3405	4.998	0.268195	10.1715	55.664	27.003	7.415	0.313381	0.733147	0.394952	0.515804
'14-085'	87.1	'VAF'	56.974	70.4575	17.8785	6.68646	0.676769	42.3	51.8885	9.696	7.26979	0.694734	0.947416	0.916888	0.57564
'14-085'	9.1	'A1'	290.939	4.514	10.58	13.9025	0.846954	103.036	44.777	21.2015	14.241	0.61319	0.332139	0.24207	0.487113
'14-086'	1.1	'PAF'	127.571	61.4215	28.2505	15.0885	0.626921	64.228	36.232	15.778	8.979	0.604574	0.817077	0.506321	0.660214
'14-086'	10.1	'AAF'	11.61	403.585	86.324	10.878	0.620599	12.5415	152.9	68.4205	3.3335	0.39498	0.256959	0.761099
'14-086'	11.1	'AAF'	8.3385	176.957	167.274	14.339	0.0100352	6.973	101.844	106.957	18.37	-0.0705164	-0.0638247	0.487995	0.876926
'14-086'	12.1	'AAF'	156.02	9.65833	11.959	181.875	-0.078315	73.5685	17.5911	16.7175	88.574	-0.0719357	0.167845	0.203175	0.248661
'14-086'	13.1	'AAF'	112.126	87.8605	92.3645	102.021	0.0142011	54.803	54.524	59.475	48.7605	0.00501695	-0.144544	-0.115242	-0.0366071
'14-086'	15.1	'AAF'	119.243	114.475	90.8895	93.568	0.117798	71.075	70.2245	37.488	51.258	0.228448	0.297768	0.233902	0.218254
'14-086'	16.1	'AAF'	155.796	139.879	138.505	104.13	0.0985297	95.64	67.546	85.2325	65.319	0.0402709	0.194214	0.159349
'14-086'	17.1	'AAF'	112.665	122.933	41.9255	56.801	0.409396	78.9795	79.249	25.9935	44.96	0.380811	0.710058	0.473728	0.594094
'14-086'	18.1	'AAF'	430.127	298.063	208.542	174.254	0.31089	170.922	166.318	129.316	115.909	0.157975	0.482616	0.549263	0.544409
'14-086'	2.1	'A1'	189.367	249.849	109.925	129.135	0.295094	71.824	69.4145	62.0195	62.9045	0.0612953	-0.0383067	0.267234	0.533572
'14-086'	20.1	'AAF'	274.105	370.841	190.024	247.467	0.191655	142.077	140.25	118.513	108.368	0.108885	0.0359804	0.119474
'14-086'	21.1	'AAF'	322.154	272.892	351.578	210.931	0.0281085	186.768	134.445	167.355	157.619	-0.00581903	0.0555023	0.424035
'14-086'	22.1	'AAF'	18.5406	265.046	7.8485	13.0411	0.862783	17.3693	119.007	14.411	25.8776	0.543899	0.392789	0.0635772	0.571838
'14-086'	23.1	'AAF'	113.889	59.444	18.843	18.356	0.646619	76.2865	49.6855	24.9395	13.3845	0.533476	0.556817	0.883767	0.70903
'14-086'	25.1		72.92	143.969	28.845	30.914	0.567978	42.5475	75.2575	26.5355	16.4865	0.46499	0.709778	0.413287	0.326556
'14-086'	28.1	'AAF'	120.515	81.221	89.0215	72.5635	0.110511	66.1865	52.0905	54.9845	57.394	0.0255728	0.202502	-0.0376593	0.498407
'14-086'	29.1	'AAF'	262.94	366.407	260.188	263.205	0.0919148	109.489	171.865	132.763	135.826	0.0232099	0.0851741	0.395787	0.549065
'14-086'	3.1	'A1'	320.882	340.336	181.324	177.625	0.296293	96.878	92.4745	98.2985	72.8815	0.0504046	0.118006	0.600245	0.551551
'14-086'	30.1	'AAF'	192.567	227.892	179.111	160.744	0.106014	148.837	134.769	148.745	125.082	0.017542	-0.0202144
'14-086'	31.1	'AAF'	114.4	223.77	53.0645	105.585	0.361338	97.8715	90.8203	37.033	70.3885	0.274457	0.518696	0.989297
'14-086'	34.1	'VAF'	180.399	247.774	51.7865	97.845	0.482069	92.757	106.448	40.8785	65.9945	0.301661	0.332198	0.241826	-0.0877836
'14-086'	35.1	'VAF'	141.833	11.8714	10.9682	79.0854	0.261122	64.2953	3.58542	12.9708	51.8526	0.0230384	0.279626	0.0225818	0.205376
'14-086'	36.1	'VAF'	124.293	199.766	41.3835	18.359	0.688679	49.6385	95.9415	27.9755	23.7785	0.475468	0.60184	0.0984534	0.182882
'14-086'	37.1	'VAF'	185.773	6.54886	6.85417	34.0265	0.649398	87.573	15.558	5.13125	29.5235	0.496976	0.435887	0.163777	0.0107054
'14-086'	38.1	'VAF'	123.076	113.11	72.9595	66.185	0.258549	58.903	66.017	41.798	26.099	0.295736	0.342436
'14-086'	39.1	'VAF'	94.0295	62.198	77.198	52.7065	0.091996	50.6215	23.503	39.789	41.225	-0.0444087	0.0729791	0.00711065	0.200682
'14-086'	39.2	'VAF'	214.853	82.587	83.5355	47.974	0.38683	98.283	53.2005	46.8825	23.225	0.367235	0.375753	0.270652	0.43762
'14-086'	4.1	'A1'	222.3	211.298	133.216	89.047	0.322225	80.2125	89.2745	43.6625	31.035	0.388188	0.551324	0.417155	0.681544
'14-086'	40.1	'VAF'	181.471	133.485	110.251	62.389	0.291873	63.5175	55.2396	56.046	28.7195	0.167016	0.548241	0.525705	0.38298
'14-086'	42.1	'VAF'	43.6505	133.128	33.4925	95.962	0.154536	33.5515	76.2025	27.995	61.0665	0.104079	0.125845	0.295418	0.150277
'14-086'	43.1	'VAF'	92.6932	73.1937	21.825	28.631	0.533555	28.3583	28.8776	12.885	8.7725	0.450968	0.639577	0.493052	0.34726
'14-086'	44.1	'VAF'	4.46927	123.249	39.296	11.7927	0.428562	10.0927	38.9665	13.772	11.0526	0.32801	0.176105	0.118717	0.312373
'14-086'	45.1	'VAF'	155.773	149.817	62.062	45.166	0.480506	74.9745	75.4828	32.975	36.137	0.370477	0.223346	0.0885109	0.221406
'14-086'	46.1	'VAF'	131.065	140.044	80.5205	34.025	0.405968	77.4215	64.841	21.7155	28.024	0.481886	0.318793	0.0660604	0.0451412
'14-086'	47.1	'VAF'	132.847	113.621	59.402	36.314	0.440558	66.4335	52.2815	36.5085	29.7415	0.283648	0.405978	0.442757	0.43156
'14-086'	48.1	'VAF'	106.933	17.123	1.341	41.9705	0.48244	54.818	6.7535	12.924	34.79	0.126801	0.586594	0.493244	0.731891
'14-086'	49.1	'VAF'	159.202	166.999	17.4565	37.1365	0.713268	81.595	71.6625	17.0245	36.3135	0.483648	0.698055	0.717292	0.906337
'14-086'	5.1	'VAF'	91.106	66.3525	49.033	16.8365	0.41011	76.2485	51.427	33.1835	10.8365	0.487232	0.88614	0.486726	0.473948
'14-086'	50.1	'VAF'	178.337	216.749	91.2795	66.294	0.429762	90.958	81.5155	70.265	37.607	0.230435	0.428755	0.227796
'14-086'	51.1		198.093	280.425	83.548	133.234	0.376435	104.502	99.5725	57.5075	72.7955	0.220625	0.548266	0.74422	0.982168
'14-086'	52.1	'AAF'	209.381	412.954	114.392	142.022	0.416411	108.301	138.214	76.756	79.6078	0.223768	0.137993	0.419033	0.873099
'14-086'	53.1	'AAF'	209.321	315.284	55.677	105.153	0.530723	126.659	122.501	32.252	95.3105	0.322777	0.865143	0.976155	1
'14-086'	54.1	'AAF'	244.535	245.781	144.578	136.719	0.270885	102.014	109.291	81.804	75.8815	0.145313	0.305692	0.765335	0.579062
'14-086'	55.1	'AAF'	275.686	220.013	115.041	149.667	0.303773	130.677	126.525	75.953	81.53	0.240469	0.228213	0.501403	0.9454
'14-086'	56.1	'AAF'	226.892	246.182	132.73	133.764	0.279325	105.406	115.358	76.226	68.16	0.209168	0.362636	0.455773	0.727099
'14-086'	57.1	'AAF'	9.9265	227.797	94.6905	6.4265	0.403159	6.9185	107.98	60.2635	4.291	0.280539	0.155626	0.172415	0.306116
'14-086'	58.1	'AAF'	8.5605	12.2115	10.8845	18.868	-0.177745	8.6305	1.6655	0.511	4.6345	0.333549	0.345266	0.170917	0.391043
'14-086'	6.1	'VAF'	71.697	55.6984	25.4415	18.6745	0.485562	66.13	52.1406	21.24	15.3315	0.527629	0.79672	0.450839	0.428492
'14-086'	61.1	'AAF'	99.4565	8.306	9.5125	91.8465	0.030621	54.9595	1.203	3.5595	52.718	-0.00102277	-0.328884	0.2753	0.389441
'14-086'	62.1	'AAF'	105.776	218.958	85.5235	129.263	0.203787	43.147	123.295	44.841	67.948	0.192146	0.340062	0.212932	0.274291
'14-086'	63.1	'AAF'	115.319	80.0265	42.2705	22.6825	0.500935	62.618	45.019	28.504	18.603	0.391162	0.742125	0.0606954	0.352785
'14-086'	64.1	'AAF'	146.725	177.246	90.389	86.419	0.293868	59.4765	71.136	54.1	49.6375	0.114679	0.373313	0.913197	0.783751
'14-086'	65.1	'AAF'	189.642	269.029	101.813	109.303	0.369602	108.613	116.428	64.8845	65.9705	0.264645	0.425569	0.708848	0.850266
'14-086'	66.1	'AAF'	143.214	137.26	50.336	39.178	0.516125	73.4685	74.6595	39.604	21.833	0.413671	0.687554	0.599324	0.396851
'14-086'	67.1	'VAF'	204.938	175.037	88.38	57.3635	0.445545	103.031	79.0125	54.095	36.477	0.335534	0.638389	0.596529	0.728586
'14-086'	68.1	'VAF'	88.0275	69.378	17.156	5.4445	0.748892	49.149	50.8275	10.491	6.2585	0.713012		0.984783	0.96047
'14-086'	69.1	'VAF'	136.492	147.131	49.5125	19.169	0.610102	78.7589	77.2062	35.1745	14.19	0.519168	0.785447	0.911918
'14-086'	7.1		120.727	233.603	42.1305	91.981	0.45086	76.5448	90.8885	30.847	54.7925	0.323203	0.394604	0.183476	0.391934
'14-086'	70.1	'VAF'	99.8406	124.606	58.8695	42.8307	0.376354	77.6432	87.533	45.053	42.3781	0.307771	0.616227	0.272109	-0.823309
'14-086'	71.1	'VAF'	74.37	97.4844	19.7655	38.475	0.49377	59.8885	58.6917	18.9395	22.31	0.483832	0.857231	0.422948	0.428611
'14-086'	72.1	'VAF'	190.296	195.387	40.236	58.0495	0.593835	66.7085	82.792	26.0545	48.872	0.332286	0.791976	0.616986	0.682587
'14-086'	73.1	'VAF'	112.213	121.928	43.7415	41.0875	0.468107	67.3065	58.111	32.199	26.1045	0.365304	0.893322	0.5517	0.521175
'14-086'	74.1	'VAF'	75.9685	86.485	21.2505	18.3145	0.608303	36.935	49.238	12.0265	7.778	0.626251		0.58978	0.246973
'14-086'	75.1	'VAF'	23.764	100.591	7.519	18.6875	0.651883	12.6575	32.466	12.389	9.714	0.342432	0.901617	0.584884	0.417013
'14-086'	78.1	'VAF'	119.993	117.321	36.1775	53.165	0.452988	63.107	61.4745	26.3035	30.7405	0.37185	0.732593	0.370558	0.271463
'14-086'	79.1	'VAF'	22.825	24.7225	8.77	6.737	0.50814	18.428	16.978	11.921	9.8685	0.238069			1
'14-086'	80.1	'VAF'	117.662	93.299	5.9365	15.0725	0.818865	50.05	41.3885	7.966	16.172	0.582303	0.928302	0.86685	0.935493
'14-086'	81.1	'VAF'	152.243	148.279	70.1775	33.5325	0.486879	77.3708	64.9455	43.238	17.074	0.404703	0.75932	0.752785	0.684305
'14-086'	82.1	'SRAF'	104.138	98.5187	21.6715	36.916	0.551473	59.6995	64.1016	14.1215	28.7645	0.485431	0.514264	0.740965	0.838586
'14-086'	83.1	'SRAF'	137.399	141.429	53.382	48.542	0.464617	67.6786	64.4365	47.338	38.894	0.210139	0.839138	0.804846	1
'14-086'	84.1	'SRAF'	10.449	3.466	7.328	15.1605	-0.235513	2.2415	6.6395	6.8565	17.932	-0.47246	0.769315	0.596909	0.760912
'14-086'	85.1	'SRAF'	98.523	78.8595	58.307	32.281	0.323896	49.0155	39.024	38.062	26.42	0.154454	0.646399
'14-086'	86.1	'SRAF'	134.456	124.537	61.3505	39.506	0.439451	54.1735	69.924	31.2895	28.154	0.352259	0.662238	0.95545	0.954335
'14-086'	87.1	'SRAF'	136.038	88.115	52.5855	33.9315	0.44303	76.805	49.599	30.348	25.5245	0.386948		0.628118	0.620818
'14-086'	88.1	'SRAF'	29.9655	245.097	95.664	33.2745	0.361693	15.6055	123.245	50.453	14.258	0.36421	0.750986	0.764756	0.578726
'14-086'	89.1	'AAF'	204.371	200.823	33.574	57.834	0.631866	78.1335	86.0687	26.4435	34.0465	0.461575	0.647613	0.78472	0.90321
'14-086'	91.1		95.3214	79.24	12.0925	13.657	0.742905	52.5406	32.4175	15.9115	13.081	0.491139	0.861093	0.795017	0.687755
'14-086'	92.1	'SRAF'	154.881	96.378	22.749	20.811	0.704496	74.7479	42.8165	31.665	16.0645	0.422489	0.999994	0.872265	0.721193
'14-086'	95.1	'SRAF'	73.1797	96.875	43.88	39.154	0.343835	52.0922	44.365	34.24	27.768	0.217393		0.956643
'14-086'	96.1	'SRAF'	110.763	10.901	8.6205	37.9755	0.446145	49.4685	11.279	8.449	26.141	0.274367	0.521875	0.493494	0.767251
'14-095'	1.1	'A1'	148.891	65.25	50.65	5.999	0.581601	101.701	49.3365	32.7285	2.8635	0.618582	0.751466	0.817709	0.904175
'14-095'	100.1	'SRAF'	93.664	135.092	77.9205	91.198	0.149891	70.175	63.749	60.5235	63.739	0.0374205	0.323561	0.603405	0.599632
'14-095'	101.1		67.7375	55.024	44.5175	32.8785	0.226649	43.9125	35.323	31.3005	29.5045	0.131608	0.224885	0.0799131
'14-095'	102.1	'AAF'	174.568	178.415	55.3845	37.7155	0.582589	117.184	118.412	66.428	30.4755	0.417122	0.789048	0.596637	-0.926452
'14-095'	103.1	'AAF'	165.035	151.5	49.2775	20.0095	0.640834	110.406	111.342	44.1725	23.854	0.530487	0.748744	0.65225	-0.856519
'14-095'	104.1	'AAF'	144.077	183.518	29.2795	29.4675	0.695881	87.577	101.556	33.8775	37.837	0.450142	0.679702	0.335145	0.250708
'14-095'	105.1	'AAF'	291.863	10.418	15.931	90.6755	0.478553	122.632	8.8105	6.322	64.9685	0.296706	0.0812469	0.162382	0.270658
'14-095'	106.1	'AAF'	8.1365	109.859	105.231	6.954	0.025241	3.5955	80.395	75.3995	8.808	-0.00129015	0.331711	0.503239
'14-095'	107.1	'AAF'	139.256	76.099	54.1625	21.582	0.479596	80.305	62.5215	37.606	11.9025	0.485185	0.68137	0.842547
'14-095'	108.1		70.1105	93.8405	86.5265	82.0345	-0.0138642	48.175	56.771	59.01	52.2105	-0.0290262	-0.0839158	-0.108242
'14-095'	109.1	'SRAF'	49.356	69.7635	10.7135	17.8585	0.613085	34.63	48.8515	5.5495	14.879	0.606804	0.960543	0.830111
'14-095'	11.1	'PAF'	16.6224	17.098	16.221	14.5965	0.0449797	12.9245	15.7095	14.449	13.2785	0.0160833		-0.322752
'14-095'	110.1	'SRAF'	81.4135	67.9675	25.003	5.8895	0.657271	51.313	47.533	21.9555	10.761	0.502647	0.90354	0.602947
'14-095'	12.1	'PAF'	14.387	11.261	12.639	13.8455	-0.0160457	15.1635	16.9635	14.4	17.1545	0.00899005
'14-095'	13.1	'PAF'	55.5974	55.465	13.7755	15.26	0.585497	32.701	21.888	8.267	14.374	0.413674	0.810068	0.843545	0.772651
'14-095'	16.1	'PAF'	84.4505	81.838	25.0035	36.543	0.459727	55.1105	48.898	16.9285	24.9635	0.425746	0.818047	0.773172	0.707335
'14-095'	17.1	'A1'	44.3885	159.917	21.333	91.4455	0.288652	36.319	61.721	29.9835	48.775	0.109059	0.383258	0.384325	0.623364
'14-095'	18.1	'A1'	225.977	146.888	133.452	128.395	0.174911	69.133	69.526	72.6525	55.683	0.0386656	0.0331514	0.221282	0.0444354
'14-095'	19.1	'A1'	21.2095	38.609	14.4265	17.6	0.302597	22.9225	32.0675	7.3945	11.3	0.49258	0.716245	0.290428	0.216658
'14-095'	2.1	'A1'	343.423	111.546	96.3065	31.856	0.560434	135.178	82.792	54.94	30.8655	0.435073	0.708351	0.726634	0.733441
'14-095'	22.1		131.804	277.629	40.211	86.1905	0.528207	93.5786	77.6552	19.825	53.783	0.39873	0.723606	0.872389	0.71353
'14-095'	23.1		89.5151	162.258	23.298	24.91	0.678594	77.0979	89.2835	8.9365	27.2165	0.642994	0.836766	0.818085	0.445679
'14-095'	25.1		50.707	17.3781	18.9438	25.463	0.21049	46.435	9.33229	10.9161	11.446	0.427562	-0.106688	0.0882764
'14-095'	26.1		23.441	9.3525	24.469	11.7955	-0.0502621	18.936	10.4965	14.667	8.2225	0.125053	0.150768
'14-095'	27.1	'AAF'	195.917	147.136	87.815	107.624	0.274125	96.4715	79.9195	58.209	46.8735	0.25334	0.413592	0.520017	0.538483
'14-095'	28.1	'AAF'	209.915	128.163	117.403	59.982	0.311747	74.0985	77.2045	57.849	34.542	0.241746	0.172951	0.583594	-1
'14-095'	31.1	'A1'	93.4095	49.8035	55.987	64.3675	0.0867273	35.0645	17.101	33.3175	32.549	-0.116079	0.0510667	0.619024	0.409054
'14-095'	32.1	'A1'	121.615	197.369	134.454	152.869	0.0522186	34.4695	53.5865	38.043	49.907	0.000602252	0.010327	0.121046	0.29748
'14-095'	33.1	'VAF'	39.033	8.014	5.9195	14.674	0.39109	18.129	7.9735	6.2375	11.9995	0.177393		0.952515
'14-095'	34.1	'PAF'	43.4047	4.89	3.391	9.5525	0.577274	31.4964	7.4325	1.278	10.4065	0.538284			0.973315
'14-095'	37.1	'VAF'	62.546	14.226	30.076	11.752	0.294638	18.5685	10.0312	15.516	6.189	0.13706		0.842551	0.964119
'14-095'	38.1	'VAF'	52.4095	4.644	3.6505	9.58	0.623513	30.0375	8.349	9.071	3.125	0.517778	0.770792	0.646045
'14-095'	39.1		79.1805	99.8825	19.964	18.136	0.649111	30.9045	44.3745	17.721	9.969	0.462168	0.755655	0.527558	0.366712
'14-095'	4.1		115.174	106.478	38.15	24.6655	0.558364	76.4075	77.8915	25.925	17.1495	0.563523	0.75399	0.659034	0.794386
'14-095'	41.1	'AAF'	243.91	129.734	165.477	103.698	0.162517	143.524	81.876	106.612	75.675	0.105749	0.319147	0.457429	0.41394
'14-095'	42.1	'AAF'	273.927	293.639	176.034	178.788	0.230646	126.418	128.665	92.407	88.286	0.170706	0.409647	0.510022	0.500313
'14-095'	43.1	'AAF'	71.907	81.781	56.2855	49.4465	0.184859	44.463	50.252	36.1525	39.4715	0.112077	-0.595905
'14-095'	46.1	'AAF'	175.011	353.592	166.456	128.667	0.283445	87.7185	111.436	78.4725	62.673	0.170464	0.509983	0.318952	0.291691
'14-095'	47.1	'VAF'	12.4915	15.981	5.969	5.226	0.435558	5.7175	9.785	8.964	9.8545	-0.0966172	0.582361	0.466633	0.892709
'14-095'	49.1	'VAF'	44.2891	57.2422	7.702	7.7645	0.73561	37.1458	47.774	9.046	11.514	0.610162	0.671147	0.87044	0.82886
'14-095'	5.1		35.29	58.753	7.6705	11.753	0.657635	38.8815	27.2875	12.1205	9.617	0.50544	0.675962	0.664504	0.897706
'14-095'	50.1	'SRAF'	11.9695	49.1635	13.223	8.99	0.466969	12.4845	24.5354	12.029	11.1755	0.229399	0.339061	0.593433	0.661051
'14-095'	51.1	'SRAF'	65.9115	84.657	14.783	13.468	0.684028	45.8578	69.087	14.5945	15.3795	0.586334	0.748185	0.649335	0.591234
'14-095'	52.1	'AAF'	7.4565	17.1965	21.4825	27.518	-0.330568	16.836	23.2885	10.6565	26.946	0.0324469	0.560006	0.765585
'14-095'	53.1	'AAF'	186.218	163.684	62.271	26.266	0.596126	81.8535	90.4135	34.8845	33.93	0.429118	0.618027	0.624028	0.668794
'14-095'	54.1	'AAF'	66.665	119.01	37.4675	48.4615	0.367248	39.5075	51.0485	26.7335	29.742	0.23179	0.591988	0.47124	0.439523
'14-095'	55.1		20.255	7.152	2.3165	13.3625	0.2722	23.671	8.0215	9.9355	18.622	0.0520332
'14-095'	56.1	'AAF'	122.079	153.188	9.6565	42.771	0.680022	66.3425	73.5292	13.8505	20.017	0.610134	0.954629	0.932932	0.925196
'14-095'	57.1	'SRAF'	152.22	176.452	23.9655	33.684	0.701547	90.8505	81.5935	19.6085	23.0305	0.603511	0.870506	0.93243	0.666378
'14-095'	58.1	'SRAF'	68.9845	151.348	26.4065	71.215	0.38594	49.775	77.3865	17.9035	52.2385	0.288994	0.885259		0.178486
'14-095'	59.1	'SRAF'	112.677	76.6151	43.824	24.5495	0.469284	54.2705	38.9396	19.4845	19.7225	0.407826	0.364377	0.614671	0.814857
'14-095'	60.1	'SRAF'	47.3599	6.4185	8.009	16.314	0.377143	35.8406	6.225	6.205	14.5465	0.339304	0.521312	0.740049	0.738348
'14-095'	61.1	'SRAF'	60.693	38.0333	9.304	10.2505	0.669355	29.9885	21.6776	10.2845	4.613	0.552383		0.795395	0.881582
'14-095'	62.1	'SRAF'	50.939	9.9475	5.489	11.9605	0.554496	21.2685	8.112	6.895	9.5895	0.281173			0.392227
'14-095'	63.1	'SRAF'	23.64	18.6095	6.746	6.3	0.528135	16.9645	15.448	7.597	6.6385	0.389663		0.983189	0.966106
'14-095'	64.1	'SRAF'	53.927	6.2315	4.8945	16.347	0.478096	38.1265	8.5435	7.132	15.302	0.350718	0.917435	0.698181	0.64104
'14-095'	65.1	'SRAF'	40.022	63.5505	27.846	33.904	0.252975	25.08	36.8235	18.5025	21.719	0.212308		0.941765	0.964445
'14-095'	66.1	'SRAF'	134.001	96.598	32.292	26.2845	0.594873	68.1375	38.998	21.995	14.336	0.493526		0.930177	0.899791
'14-095'	67.1	'SRAF'	228.036	232.579	55.637	68.4325	0.575602	100.634	81.8635	34.799	40.213	0.417404	0.539455	0.645705	0.668411
'14-095'	70.1	'AAF'	95.0715	44.5215	13.944	12.6475	0.679976	43.432	23.675	15.3425	14.138	0.389559	0.906836	0.99974	1
'14-095'	71.1	'AAF'	108.786	126.428	31.083	39.024	0.540766	61.079	76.8565	28.236	29.6865	0.408526	0.515987	0.507627	0.334096
'14-095'	73.1	'SRAF'	128.191	9.3885	20.693	41.833	0.375071	54.953	13.206	15.2215	27.8585	0.225452	0.803151	0.978515	0.776633
'14-095'	75.1	'SRAF'	22.3073	10.5802	9.54323	14.6635	0.152042	11.7016	9.43177	3.0875	4.57188	0.467964	0.662984	0.924892	0.871167
'14-095'	76.1	'SRAF'	42.362	23.574	6.171	5.6145	0.696725	28.0297	13.76	7.777	5.313	0.522956	0.851792	0.96562
'14-095'	77.1	'SRAF'	134.059	144.853	27.963	53.1285	0.549496	78.0175	87.7234	16.6845	40.1025	0.489619	0.895074	0.846266	0.874229
'14-095'	78.1	'SRAF'	8.089	35.6565	18.4425	10.441	0.204629	10.1285	21.553	13.389	6.071	0.238974	0.967236	0.976627	0.929383
'14-095'	79.1	'SRAF'	73.604	68.8825	45.995	29.204	0.309104	26.213	30.9325	18.334	18.3215	0.218441		0.775592	0.634158
'14-095'	80.1	'SRAF'	14.1985	30.8205	7.5735	8.963	0.462713	6.7685	32.509	7.6185	6.9965	0.457624		0.922767	0.983325
'14-095'	81.1	'SRAF'	23.9875	24.924	2.686	3.8975	0.762735	18.2615	14.3845	8.3575	5.2075	0.41291
'14-095'	83.1	'SRAF'	42.5045	16.0198	6.9595	5.2555	0.654647	25.076	10.249	8.0615	7.6155	0.385239		0.998856	0.904498
'14-095'	84.1	'SRAF'	51.059	56.3891	5.0535	14.056	0.698011	28.874	20.5927	6.3625	10.8745	0.483177			0.816922
'14-095'	85.1	'SRAF'	94.3645	131.96	17.2285	36.8665	0.614185	43.115	53.35	13.1295	19.342	0.496318	1	0.681337	0.242299
'14-095'	86.1	'SRAF'	171.018	204.232	59.993	65.35	0.499222	65.456	65.2714	28.469	36.677	0.334815	0.699154	0.306192	0.291076
'14-095'	89.1	'SRAF'	86.0565	89.5755	42.6735	13.8065	0.513338	47.338	50.4693	20.7765	10.317	0.517559	0.737627	0.743524	0.674497
'14-095'	92.1	'SRAF'	88.525	103.221	57.8385	77.013	0.174205	41.675	52.6078	40.7375	42.2735	0.063577	0.163615	0.326004	0.55389
'14-095'	93.1	'SRAF'	26.119	36.7275	7.4955	9.538	0.573523	22.312	31.556	6.415	6.722	0.60788		0.89966	0.940587
'14-095'	94.1	'SRAF'	41.1025	5.7665	7.8225	4.596	0.581075	21.3805	3.8225	6.463	9.5595	0.22269		0.92286	0.988999
'14-095'	97.1	'SRAF'	28.072	67.177	5.012	14.452	0.660649	27.346	41.7005	4.3095	16.609	0.534964	0.81756	0.739467	0.695572
'14-095'	98.1	'SRAF'	56.246	67.3265	46.8365	47.543	0.133942	34.3475	45.7315	35.2355	34.694	0.0676595	0.289532	0.604077
'14-095'	99.1	'SRAF'	52.1645	63.5275	26.029	35.8795	0.302834	22.2935	38.518	19.86	24.8515	0.152573	0.593179	0.723365
'14-097'	1.1	'PAF'	13.988	20.469	4.4385	4.303	0.595287	17.0695	14.2335	4.922	10.555	0.338307			0.95012
'14-097'	10.1	'A1'	8.8695	85.234	52.176	16.537	0.155945	9.8255	30.4545	13.1905	11.8455	0.233388	0.689295		0.850701
'14-097'	11.1	'A1'	9.3045	8.22	7.76	8.833	0.0273027	8.153	15.423	12.737	14.818	-0.0778197	0.67188	0.427232	0.361594
'14-097'	12.1		96.2395	194.196	77.4945	96.221	0.251471	59.497	117.259	58.264	79.172	0.125146	0.408643	0.290118	0.56322
'14-097'	13.1	'A1'	97.2975	69.3765	19.1895	16.4275	0.647864	50.3075	53.5375	10.1555	11.3305	0.657132		0.621127	0.554734
'14-097'	14.1	'A1'	179.834	100.643	87.5185	55.246	0.325376	116.279	57.745	30.0365	10.2525	0.624018	0.253896	0.294	0.337866
'14-097'	15.1	'A1'	210.082	113.964	84.9675	36.744	0.453912	114.06	61.8895	39.102	19.295	0.501618	0.59398	0.834744
'14-097'	16.1	'A1'	281.582	82.3805	125.201	50.944	0.34774	96.6526	49.6605	61.602	19.135	0.288818	0.205897
'14-097'	17.1	'A1'	86.876	94.1725	44.2545	30.3145	0.416558	69.1215	65.5495	44.429	33.4245	0.267346	0.37981	0.280154
'14-097'	18.1	'A1'	133.797	167.391	60.258	70.8775	0.393345	97.5885	107.005	36.7945	61.413	0.35134	0.511623	0.262447	0.311649
'14-097'	19.1	'PAF'	52.418	68.2188	32.7445	35.807	0.275309	45.7675	53.5474	21.031	15.077	0.466737	0.679013	0.530354
'14-097'	2.1	'PAF'	55.138	23.2365	4.1185	7.837	0.735293	27.739	17.7085	7.582	11.3475	0.411917		0.862702
'14-097'	20.1	'PAF'	96.6315	55.549	90.0745	15.9305	0.178846	48.104	36.214	52.592	11.2335	0.138329	0.502681	0.519713	0.990971
'14-097'	21.1	'PAF'	88.121	61.6965	74.6535	37.1915	0.14512	41.979	37.126	48.1665	26.825	0.0266943		0.350356	0.734014
'14-097'	22.1	'PAF'	6.9315	6.1735	13.404	4.7495	-0.161508	7.962	8.8185	7.186	4.709	0.170372		0.975771	1
'14-097'	23.1	'PAF'	40.2675	64.7145	15.368	22.2805	0.472083	37.2835	32.1795	13.166	24.9255	0.29168	0.937037	0.990071	0.968649
'14-097'	24.1	'PAF'	13.204	13.218	6.404	2.416	0.499461	12.117	15.404	3.7405	14.986	0.190162
'14-097'	25.1	'PAF'	28.004	24.5145	7.5875	6.272	0.582407	15.1215	16.017	4.326	7.9775	0.433567			1
'14-097'	26.1	'PAF'	22.8205	22.6835	6.009	9.8265	0.483677	17.7465	15.8995	10.552	12.913	0.178267	0.992802	0.947332	0.768822
'14-097'	27.1	'PAF'	19.7177	5.52	7.054	6.926	0.287057	12.4245	10.0035	6.352	5.722	0.300098
'14-097'	29.1	'PAF'	16.695	15.9323	4.7215	12.617	0.305985	9.5885	13.3167	9.349	11.9145	0.0371681	-0.839187
'14-097'	3.1	'PAF'	101.126	6.42656	30.9355	8.7545	0.460888	49.9395	10.887	22.699	4.616	0.380201	0.776248	0.757166	0.731476
'14-097'	30.1	'PAF'	55.5685	23.3896	22.4905	14.3835	0.36332	37.83	25.8042	16.8395	6.5795	0.461961			0.717267
'14-097'	31.1	'PAF'	12.4165	20.796	9.593	9.3535	0.27351	17.8365	14.723	5.3935	16.5905	0.193891
'14-097'	34.1	'PAF'	74.072	85.6937	18.666	22.9285	0.586865	56.907	54.813	30.315	21.34	0.367651	0.594705	0.495639	0.671961
'14-097'	35.1	'PAF'	83.442	29.9505	14.7785	9.407	0.64841	64.2575	26.921	5.6005	10.217	0.704335	0.986474	0.921415
'14-097'	37.1	'PAF'	127.008	81.837	96.9565	63.27	0.131732	91.29	46.6115	63.733	56.53	0.0683227	0.237752	0.491208
'14-097'	38.1	'PAF'	17.5145	41.9052	13.185	20.7345	0.273199	15.88	31.6505	7.1235	13.503	0.394736		0.766806	0.724226
'14-097'	4.1	'PAF'	120.237	34.358	38.0595	1.8945	0.589266	62.643	19.637	23.4815	7.037	0.458885	0.89431	0.889373	0.966421
'14-097'	40.1	'PAF'	107.464	81.5786	52.8255	25.7375	0.412845	56.786	55.1641	1.9805	15.4765	0.7302	0.451966		0.543392
'14-097'	5.1	'PAF'	95.5	74.2354	28.856	29.864	0.485939	66.208	38.1693	17.5055	15.931	0.514758	0.707223	0.612196	0.767984
'14-097'	6.1	'PAF'	52.099	63.7015	8.354	12.6585	0.692829	39.7089	27.6795	13.3445	12.5545	0.444748	0.991397	0.915529	0.880776
'14-097'	7.1		62.22	44.4312	12.6755	15.5505	0.581456	50.4595	29.1432	12.3815	18.0085	0.447418	0.657111	0.990773	0.938625
'14-097'	8.1		29.292	44.0545	14.857	14.37	0.430126	12.819	50.907	10.582	11.001	0.494004			0.352313
'14-097'	9.1	'A1'	14.7085	115.796	15.7785	19.5225	0.574188	13.133	81.144	15.787	12.4915	0.538519	0.643083	0.848111	0.911081
